# Supplementary material for: Preparation of well-dispersed PdAu bimetallic nanoparticles on reduced graphene oxide sheets with excellent electrochemical activity for ethanoloxidation in alkaline media
Source: Royal Society of Chemistry journal article supplement (doi:10.1039/c1jm13024b), 2011-12-05
Supplement: c1jm13024b.pdf [file c1jm13024b.pdf]

## Preparation of well-dispersive PdAu bimetallic nanoparticles on reduced graphene oxide sheets with excellent electrochemical activity for ethanol oxidation

Zhongyuan Huang, Haihui Zhou, Chuanhui Li, Fanyan Zeng, Chaopeng Fu and Yafei Kuang\* □

College of Chemistry and Chemical Engineering, Hunan University, Changsha, China; State Key Laboratory for Chemo/Biosensing and Chemometrics, College of Chemistry and Chemical Engineering, Hunan University, Changsha, China;

### Supplementary Information

#### The electrochemical experiment results of PdAu/CRG and Pd/CRG

Fig. S1 is cyclic voltammograms of PdAu/CRG, Pd/CRG and Au/CRG in 1 M KOH+1 M CH<sub>3</sub>CH<sub>2</sub>OH at a scan rate of 50 mV·s<sup>-1</sup>. It can be seen that there is no obvious current of Au/CRG for ethanol oxidation, indicating that Au is inactive for ethanol oxidation in alkaline media. The onset potential of the faradaic current ( $E_{\text{onset}}$ ) and the forward peak current ( $I_f$ ) for ethanol oxidation on PdAu/CRG and Pd/CRG are shown in Table S1. Obviously, the value of  $E_{\text{onset}}$  for ethanol oxidation on the PdAu/CRG electrode is about 120 mV more negative than that on Pd/CRG. The value of  $I_f$  on the PdAu/CRG is 2.5 times as high as that on the Pd/CRG. The results show that PdAu/CRG exhibit higher electrocatalytic activities for ethanol oxidation than Pd/CRG.

Fig. S2 is chronoamperometric curves of PdAu/CRG, Pd/CRG and Au/CRG for ethanol electrooxidation at -0.3 V in nitrogen-saturated 1 M KOH+1 M CH<sub>3</sub>CH<sub>2</sub>OH solution. The pseudo-steady currents at 3600 s ( $I_s$ ) of chronoamperometric experiment for the PdAu catalysts are shown in Table S1.  $I_s$  value of PdAu/CRG is 14 times higher than that of Pd/CRG. Obviously, the electrochemical stability of PdAu/CRG is much better than that of Pd/CRG.

All these results show that presence of Au in Pd catalysts could improve the catalytic activity as well as the resistance to poisoning for ethanol oxidation in alkaline media.

#### Table and Figure Captions:

Table S1 Loading of metal particles,  $E_{\text{onset}}$ ,  $I_f$  and  $I_s$  of ethanol electrooxidation on PdAu/CRG, Pd/CRG and Au/CRG.

Fig. S1 Cyclic voltammograms of PdAu/CRG, Pd/CRG and Au/CRG in 1 M KOH+1 M CH<sub>3</sub>CH<sub>2</sub>OH at a scan rate of 50 mV·s<sup>-1</sup>.

Fig. S2 Chronoamperometric curves of PdAu/CRG, Pd/CRG and Au/CRG for ethanol electrooxidation at -0.3 V in nitrogen-saturated 1 M KOH+1 M CH<sub>3</sub>CH<sub>2</sub>OH solution.

Table S1

| Catalyst | loading of metal particles( $\mu\text{g}\cdot\text{cm}^{-2}$ ) | $I_f$<br>( $\text{mA}\cdot\text{mg}^{-1}$ ) | $E_{\text{onset}}$<br>(V vs SCE) | $I_s$<br>( $\text{mA}\cdot\text{mg}^{-1}$ ) |
|----------|----------------------------------------------------------------|---------------------------------------------|----------------------------------|---------------------------------------------|
| PdAu/CRG | 37.95                                                          | 1566                                        | -0.768                           | 216.2                                       |
| Pd/CRG   | 44.60                                                          | 634                                         | -0.644                           | 14.4                                        |
| Au/CRG   | 22.43                                                          | -                                           | -                                | -                                           |
